# Supplementary material for: Interfacial modification of the working electrode of dye-sensitized solar cells to improve the charge transport properties
Source: Royal Society of Chemistry journal article supplement (doi:10.1039/c3ta12027a), 2013-01-01
Supplement: c3ta12027a.pdf [file c3ta12027a.pdf]

**Electronic supplementary information (ESI)**

**Interfacial Modification on the Working Electrode of Dye-  
Sensitized Solar Cell to Improve the Charge Transport  
Properties**

Kuang-Wei Wu, Abebe Tedla, Yu-Tang Mu, and Yian Tai\*

*Department of Chemical Engineering, National Taiwan University of Science and Tec  
hnology, Taipei, Taiwan*

\*Corresponding Author:

Prof. Yian Tai

Department of Chemical Engineering, National Taiwan University of Science and Tec  
hnology, 43 Keelung Road Sec. 4, Taipei 106, Taiwan.

Phone: +886-2-2737-6620, Fax: +886-2-2737-6644

E-mail: [ytai@mail.ntust.edu.tw](mailto:ytai@mail.ntust.edu.tw)

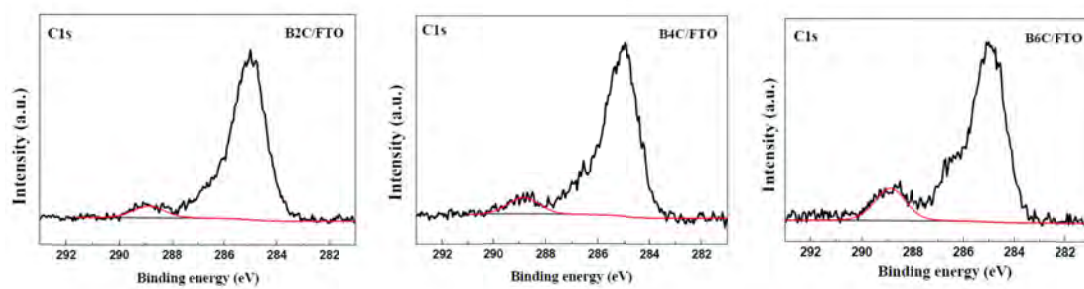

| C1s                       | B2C   | B4C | B6C   |
|---------------------------|-------|-----|-------|
| Free -COOH / Total Carbon | 0.073 | 0.1 | 0.183 |

**Figure S1.** C1s XPS spectra of B2C, B4C, and B6C fabricated on FTO. The peak intensity ratio of free -COOH to the total carbon are summaries in the table.

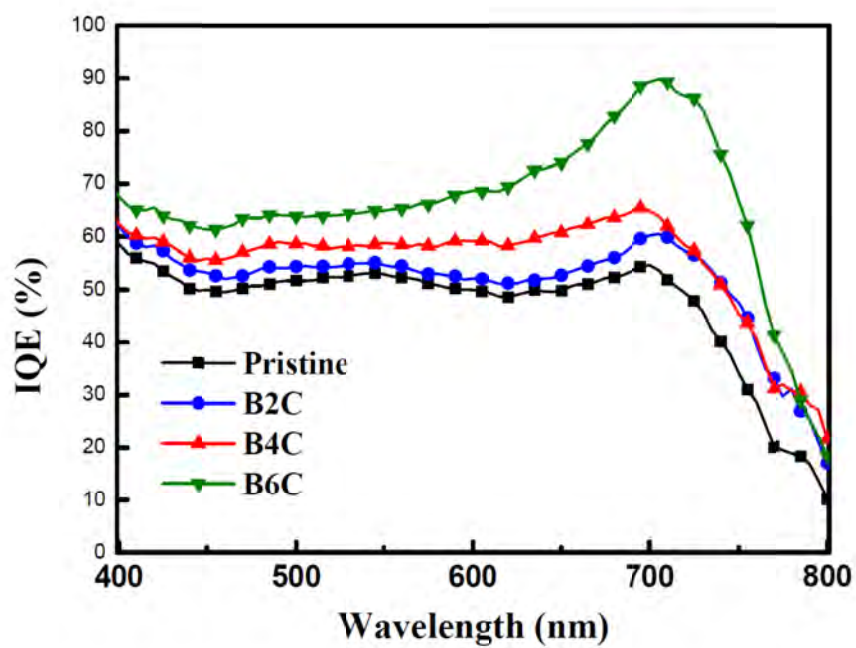

**Figure S2.** Internal quantum efficiency, calculated from the UV-Vis and EQE, of the pristine and SAMs modified DSSC. The enhancement at  $\sim 700$  nm for B6C was due to small changes at the absorption tail of the dye molecules.

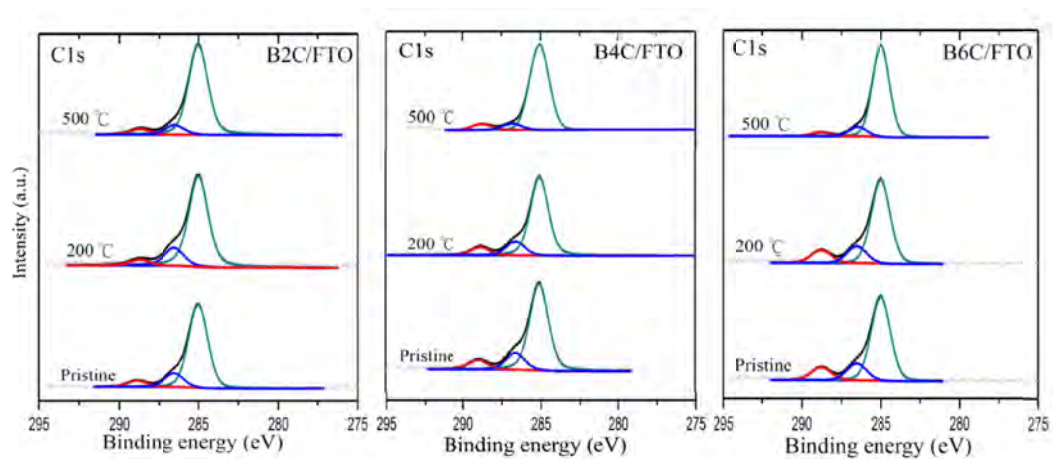

**Figure S3.** C1s XPS spectra of B2C, B4C, and B6C fabricated on FTO at room temperature (Pristine) and sintered at different temperatures.

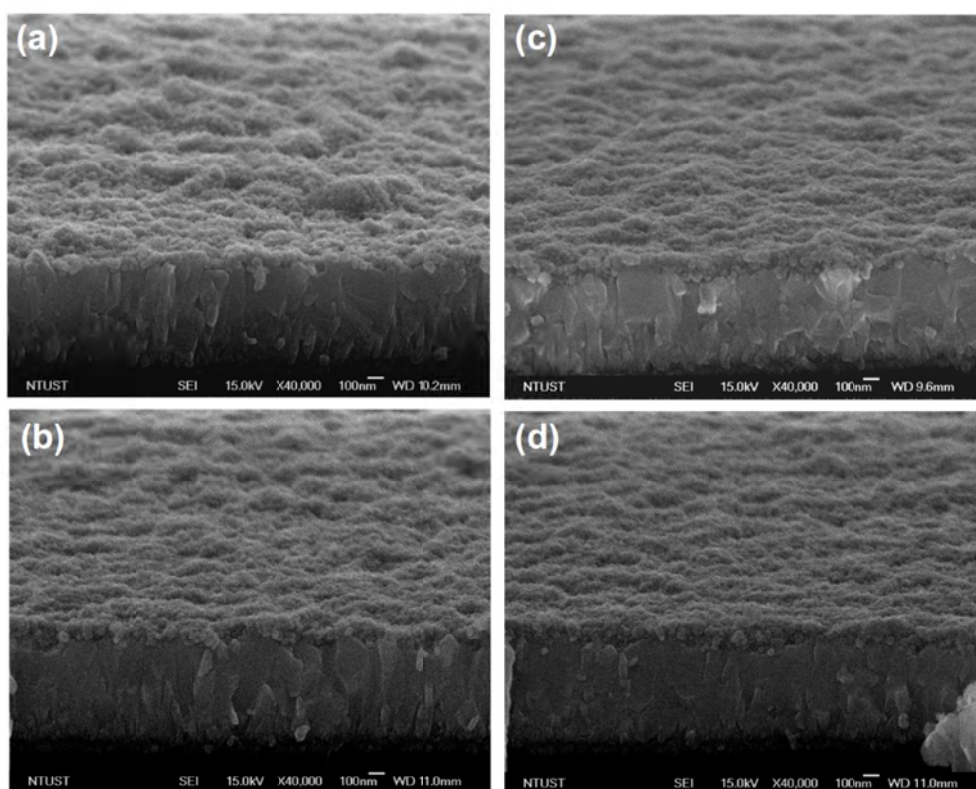

**Figure S4.** SEM Cross-sectional images of the 150 nm TiO<sub>2</sub> initial layer fabricated on (a) pristine, (b) B2C, (c) B4C, and (d) B6C modified FTO surfaces.

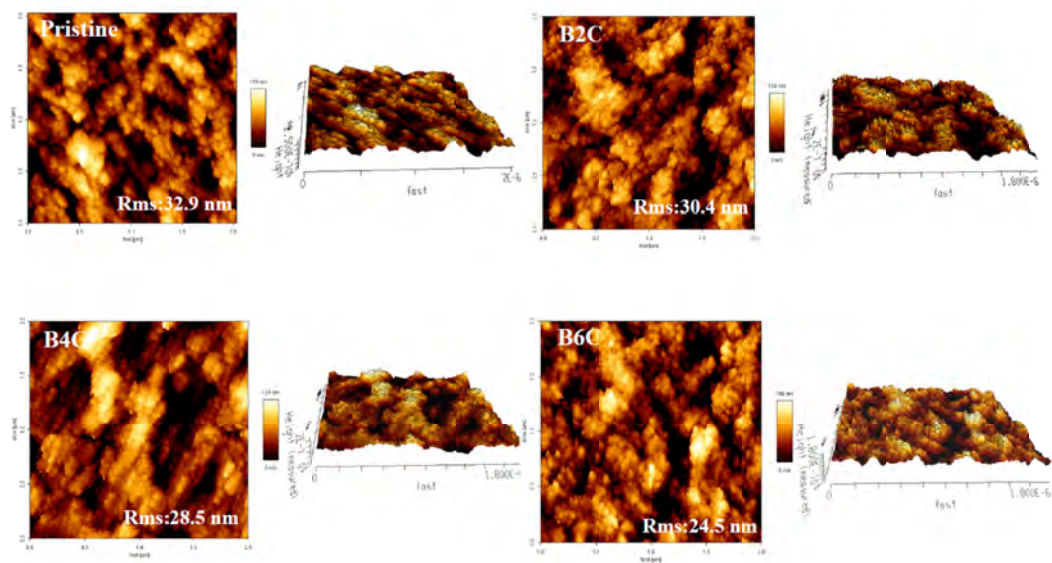

**Figure S5.** AFM image and surface roughness of 150 nm TiO<sub>2</sub> initial layers fabricated on pristine and SAMs modified FTO.

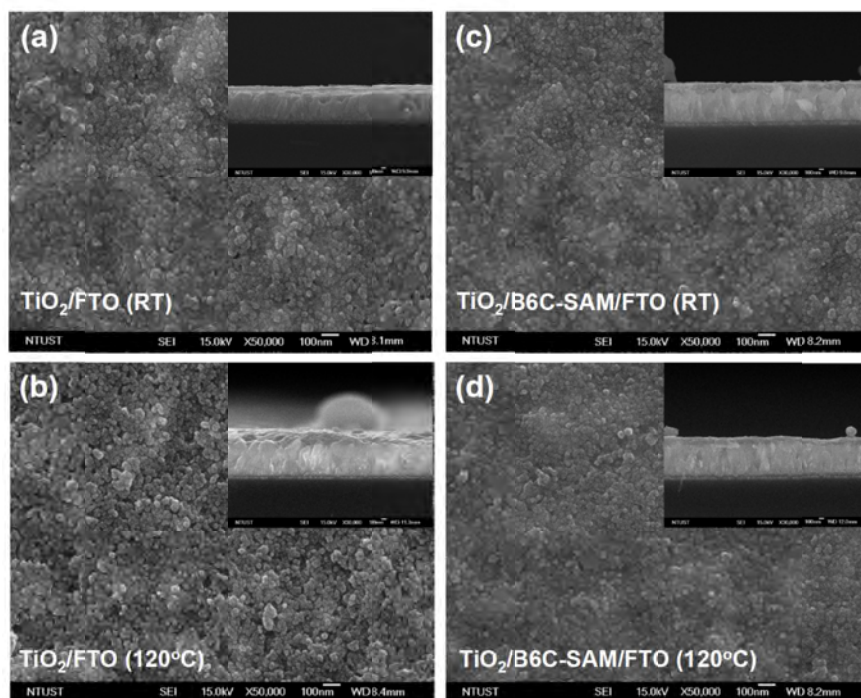

**Figure S6.** SEM images of  $\sim 150$  nm  $\text{TiO}_2$  initial layer fabricated on pristine (a)(b) and B6C (c)(d) modified FTO surfaces in room temperature and after sintered at  $120^\circ\text{C}$  for 1 h, respectively.

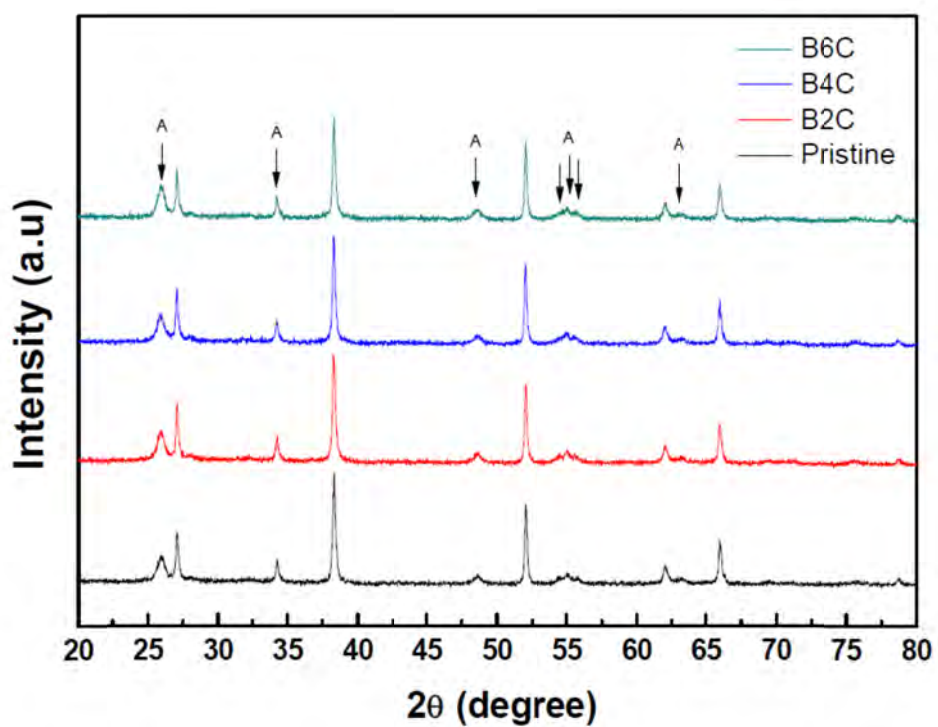

**Figure S7.** XRD profiles of TiO<sub>2</sub> initial layers on pristine and SAMs modified FTO.



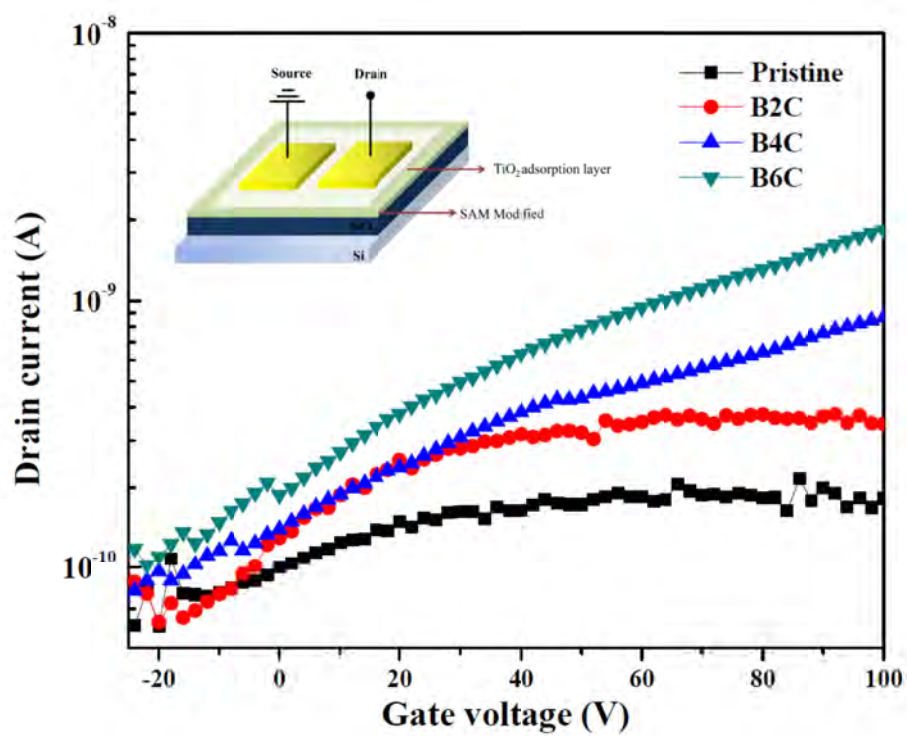

**Figure S8.** Electron mobilities of the  $\text{TiO}_2$  initial layers fabricated on pristine and B2C, B4C, and B6C modified  $\text{SiO}_2$  measured with a transistor structure.

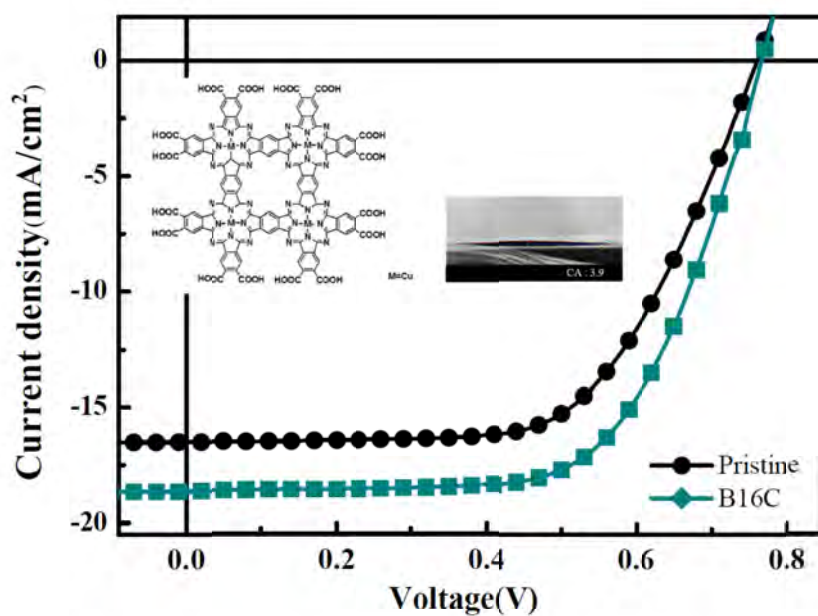

|          | J <sub>sc</sub> (mA/cm <sup>2</sup> ) | V <sub>oc</sub> (V) | Efficiency (%) | FF(%)         | R <sub>s</sub> (Ω*cm <sup>2</sup> ) |
|----------|---------------------------------------|---------------------|----------------|---------------|-------------------------------------|
| Pristine | 16.50 (±0.13)                         | 0.77 (±0.01)        | 7.70 (±0.12)   | 61.02 (±0.31) | 8.93 (±0.11)                        |
| B16C     | 18.64 (±0.15)                         | 0.77 (±0.00)        | 9.14 (±0.09)   | 63.70 (±0.38) | 6.82 (±0.08)                        |

**Figure S9.** Photocurrent density–voltage characteristics of pristine and B16C SAM modified DSSC, with the molecule structure of B16C and water contact angle of B16C/FTO surface in the inset.

**Table S1** Summary of device parameters of Pristine, plasma-treated, and SAMs-  
modified DSSC

|                 | <b>Jsc (mA/cm<sup>2</sup>)</b> | <b>Voc (V)</b>      | <b>Efficiency (%)</b> | <b>FF (%)</b>        | <b>Rs (Ω*cm<sup>2</sup>)</b> |
|-----------------|--------------------------------|---------------------|-----------------------|----------------------|------------------------------|
| <b>Pristine</b> | 16.50 (±0.13)                  | 0.77 (±0.01)        | 7.70 (±0.12)          | 61.02 (±0.31)        | 8.93 (±0.11)                 |
| <b>B2C</b>      | 17.00 (±0.09)                  | 0.77 (±0.00)        | 7.99 (±0.21)          | 61.03 (±0.33)        | 8.37 (±0.06)                 |
| <b>Plasma</b>   | <b>17.28 (±0.14)</b>           | <b>0.78 (±0.01)</b> | <b>8.04 (±0.13)</b>   | <b>59.66 (±0.40)</b> | <b>10.29 (±0.22)</b>         |
| <b>B4C</b>      | 17.65 (±0.11)                  | 0.76 (±0.00)        | 8.29 (±0.13)          | 61.80 (±0.61)        | 8.12 (±0.07)                 |
| <b>B6C</b>      | 18.29 (±0.08)                  | 0.77 (±0.00)        | 8.73 (±0.17)          | 61.72 (±0.59)        | 7.88 (±0.04)                 |
